# Supplementary material
Source: PubMed Central journal article supplement (PMC9340668)

**Supplemental Table 1:** Statistical analyses of histological assessments of mouse tumor tissues described in Table 1. The two tables on the bottom describe the statistical assessments of p120 staining in select tumor tissues depicted in Figure 7.

| <b>All Mice</b> |             |        |             |  |             |        |    |             |             |            |    |             |
|-----------------|-------------|--------|-------------|--|-------------|--------|----|-------------|-------------|------------|----|-------------|
|                 | Haired Skin |        |             |  | Oral Mucosa |        |    |             | Hyperplasia |            |    |             |
|                 | SCC         | No SCC |             |  | SCC         | No SCC |    |             | Yes         | No         |    |             |
| MmuPV1+DBP      | 11          | 5      |             |  | MmuPV1+DBP  | 4      | 12 |             |             | MmuPV1+DBP | 16 | 0           |
| DBP             | 1           | 18     |             |  | DBP         | 1      | 18 |             |             | DBP        | 12 | 7           |
|                 |             |        | OR = 34.4   |  |             |        |    | OR = 5.71   |             |            |    | OR = Inf    |
|                 |             |        | p = 1.62e-4 |  |             |        |    | p = 1.56e-1 |             |            |    | p = 9.19e-3 |

  

|            | Haired Skin |        |             |  | Oral Mucosa |        |    |             | Hyperplasia |            |    |        |
|------------|-------------|--------|-------------|--|-------------|--------|----|-------------|-------------|------------|----|--------|
|            | SCC         | No SCC |             |  | SCC         | No SCC |    |             | Yes         | No         |    |        |
| MmuPV1+DBP | 11          | 5      |             |  | MmuPV1+DBP  | 4      | 12 |             |             | MmuPV1+DBP | 16 | 0      |
| MmuPV1     | 0           | 6      |             |  | MmuPV1      | 0      | 6  |             |             | MmuPV1     | 6  | 0      |
|            |             |        | OR = Inf    |  |             |        |    | OR = Inf    |             |            |    | OR = 0 |
|            |             |        | p = 1.24e-2 |  |             |        |    | p = 5.41e-1 |             |            |    | p = 1  |

| <b>Male Mice</b> |             |        |             |  |             |        |   |             |             |            |   |             |
|------------------|-------------|--------|-------------|--|-------------|--------|---|-------------|-------------|------------|---|-------------|
|                  | Haired Skin |        |             |  | Oral Mucosa |        |   |             | Hyperplasia |            |   |             |
|                  | SCC         | No SCC |             |  | SCC         | No SCC |   |             | Yes         | No         |   |             |
| MmuPV1+DBP       | 5           | 4      |             |  | MmuPV1+DBP  | 3      | 6 |             |             | MmuPV1+DBP | 9 | 0           |
| DBP              | 1           | 8      |             |  | DBP         | 0      | 9 |             |             | DBP        | 3 | 6           |
|                  |             |        | OR = 8.69   |  |             |        |   | OR = Inf    |             |            |   | OR = Inf    |
|                  |             |        | p = 1.31e-1 |  |             |        |   | p = 2.06e-1 |             |            |   | p = 9.05e-3 |

  

|            | Haired Skin |        |             |  | Oral Mucosa |        |   |          | Hyperplasia |            |   |        |
|------------|-------------|--------|-------------|--|-------------|--------|---|----------|-------------|------------|---|--------|
|            | SCC         | No SCC |             |  | SCC         | No SCC |   |          | Yes         | No         |   |        |
| MmuPV1+DBP | 5           | 4      |             |  | MmuPV1+DBP  | 3      | 6 |          |             | MmuPV1+DBP | 9 | 0      |
| MmuPV1     | 0           | 3      |             |  | MmuPV1      | 0      | 6 |          |             | MmuPV1     | 3 | 0      |
|            |             |        | OR = Inf    |  |             |        |   | OR = Inf |             |            |   | OR = 0 |
|            |             |        | p = 2.05e-1 |  |             |        |   | 5.09E-01 |             |            |   | p = 1  |

| <b>Female Mice</b> |             |        |             |  |             |        |   |           |             |            |   |          |
|--------------------|-------------|--------|-------------|--|-------------|--------|---|-----------|-------------|------------|---|----------|
|                    | Haired Skin |        |             |  | Oral Mucosa |        |   |           | Hyperplasia |            |   |          |
|                    | SCC         | No SCC |             |  | SCC         | No SCC |   |           | Yes         | No         |   |          |
| MmuPV1+DBP         | 6           | 1      |             |  | MmuPV1+DBP  | 1      | 6 |           |             | MmuPV1+DBP | 7 | 0        |
| DBP                | 0           | 10     |             |  | DBP         | 1      | 9 |           |             | DBP        | 9 | 1        |
|                    |             |        | OR = Inf    |  |             |        |   | OR = 1.46 |             |            |   | OR = Inf |
|                    |             |        | p = 5.66e-4 |  |             |        |   | p = 1     |             |            |   | p = 1    |

  

|            | Haired Skin |        |             |  | Oral Mucosa |        |   |          | Hyperplasia |            |   |        |
|------------|-------------|--------|-------------|--|-------------|--------|---|----------|-------------|------------|---|--------|
|            | SCC         | No SCC |             |  | SCC         | No SCC |   |          | Yes         | No         |   |        |
| MmuPV1+DBP | 6           | 1      |             |  | MmuPV1+DBP  | 1      | 6 |          |             | MmuPV1+DBP | 7 | 0      |
| MmuPV1     | 0           | 3      |             |  | MmuPV1      | 0      | 3 |          |             | MmuPV1     | 3 | 0      |
|            |             |        | OR = Inf    |  |             |        |   | OR = Inf |             |            |   | OR = 0 |
|            |             |        | p = 3.33e-2 |  |             |        |   | p = 1    |             |            |   | p = 1  |

| <b>All Mice</b>          |             |
|--------------------------|-------------|
| Normal vs. Pre-Malignant | p = 3.47e-1 |
| Normal vs. Malignant     | p = 2.35e-1 |

| <b>All Mice but 1-3 (outlier)</b> |             |
|-----------------------------------|-------------|
| Normal vs. Pre-Malignant          | p = 5.03e-2 |
| Normal vs. Malignant              | p = 1.29e-2 |

**Supplemental Figure 1:** E4 MmuPV1 RNA in situ hybridization from mouse 3-1 (UOM) showing viral tumor tissues with foci that are strongly positive for viral RNA and several foci that are weakly positive for viral RNA.

### MmuPV1 +DBP Group

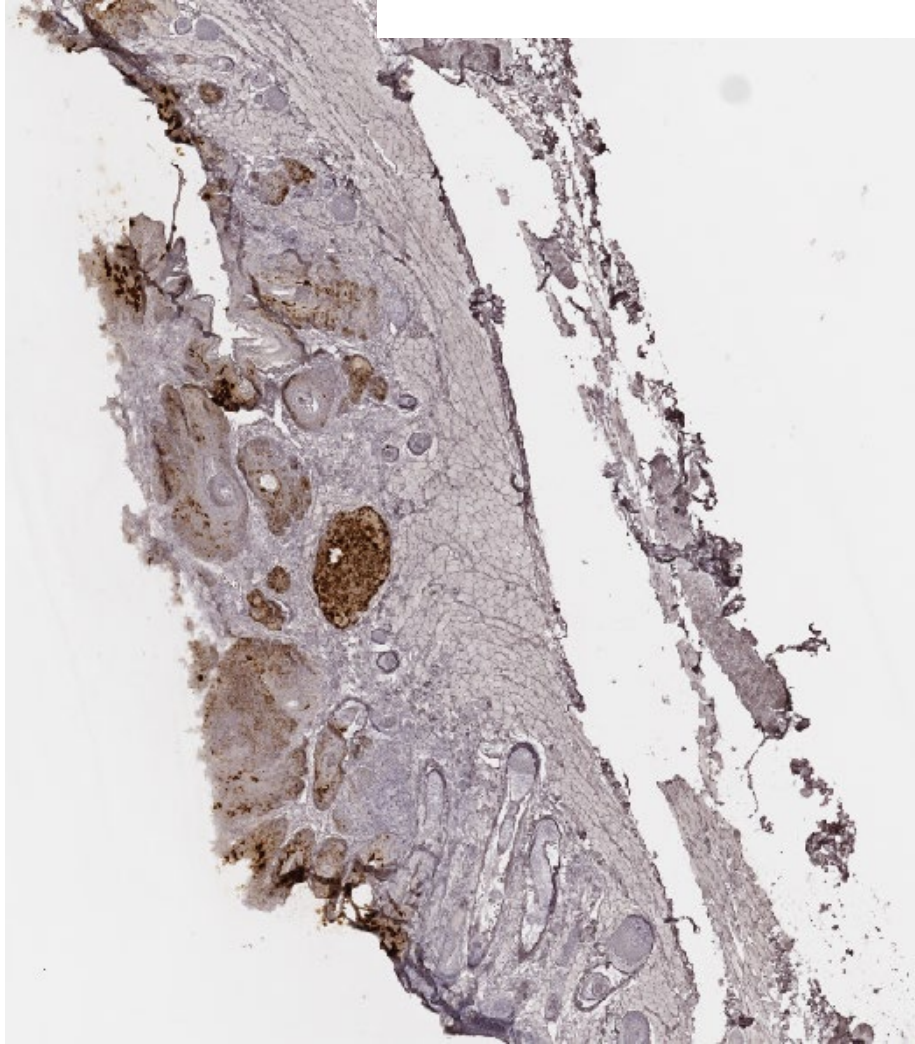

3-1UOM  
E4RNA-ISH

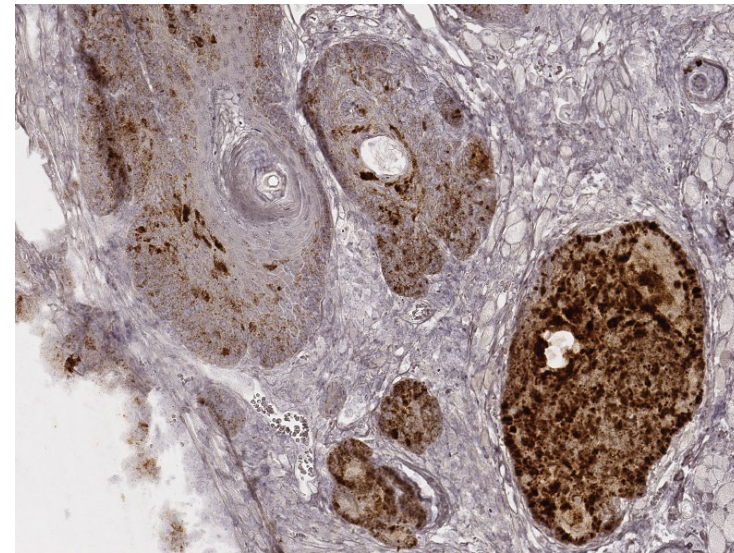

**Supplemental Figure 2:** E4 MmuPV1 RNA in situ hybridization from mouse 1-2 (UOM) showing tumor tissues strongly positive for viral RNA.

### MmuPV1 +DBP Group

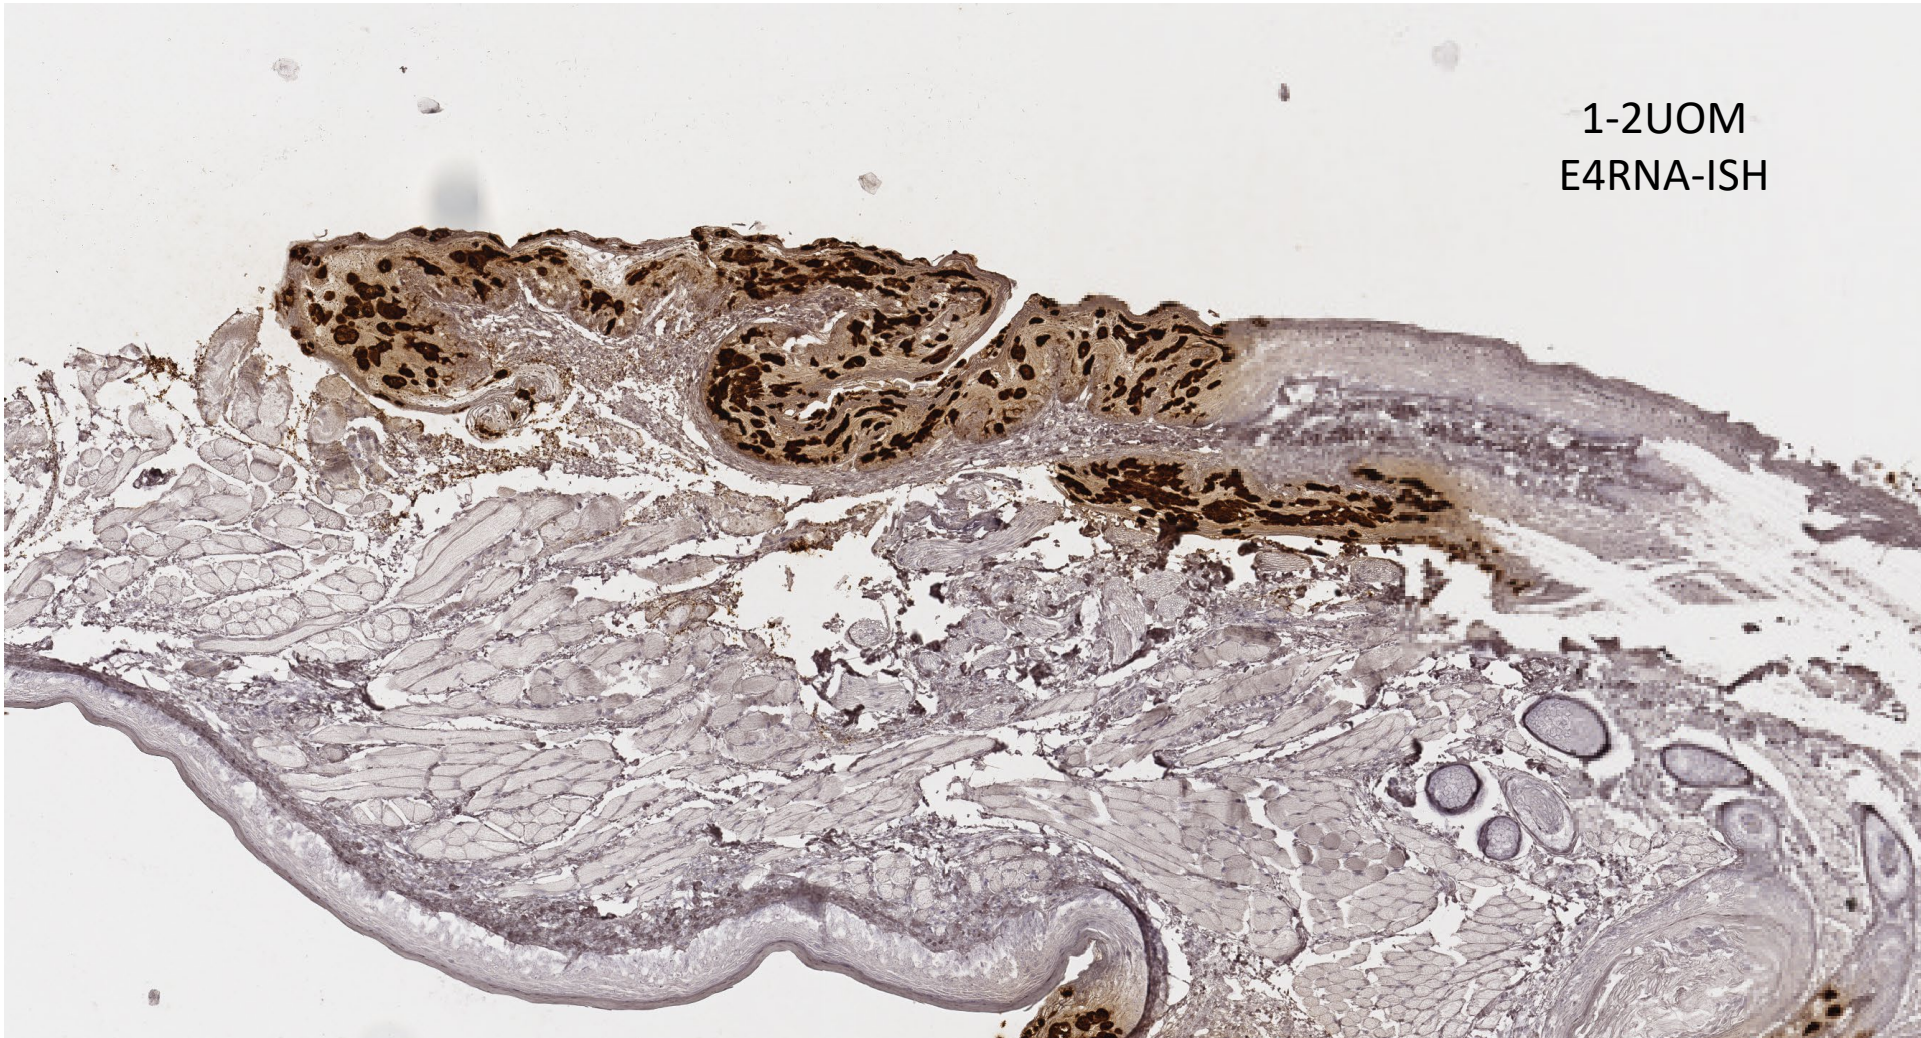

Supplement: NIHMS1824790-supplement-supplementary_table_and_figure.pdf [file NIHMS1824790-supplement-supplementary_table_and_figure.pdf]
